# Supplementary material for: Enhancement of Room Temperature Ethanol Sensing by Optimizing the Density of Vertically Aligned Carbon Nanofibers Decorated with Gold Nanoparticles
Source: MDPI journal article supplement (doi:10.3390/ma15041383), 2022-02-13
Supplement: s1 [file s1]

# Enhancement of room temperature Ethanol sensing by optimizing the density of Vertically Aligned Carbon Nanofibers decorated with Gold nanoparticles

Mostafa Shooshtari<sup>1</sup>, Leandro Nicolas Sacco<sup>2</sup>, Joost van Ginkel<sup>2</sup>, Sten Vollebregt<sup>2</sup> and Alireza Salehi<sup>1</sup>

<sup>1</sup> Department of Electrical Engineering, K N Toosi University of Technology, Tehran, Iran

<sup>2</sup> Department of Microelectronics, Laboratory of Electronic Components, Technology and Materials (ECTM), Delft University of Technology, Delft, CD, The Netherlands

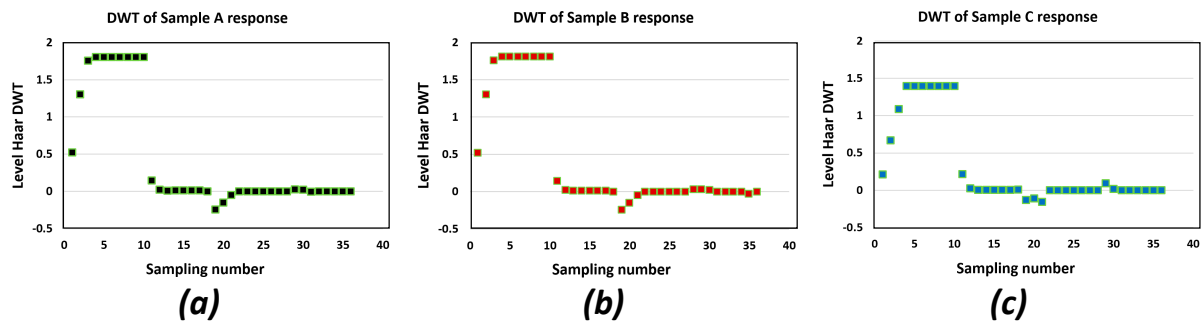

Figure S1: Results extracted of DWT decomposition for gas response value of a) high-density (sample A), b) Mid-density (sample B) and c) low-density (sample C) CNF sensor to 100 ppm of ethanol vapor.
